# Supplementary material for: Crape myrtle bark scale Acanthococcus lagerstroemiae (Coccidae: Eriococcidae) infestation seasonally alters the abundance and composition of insect assemblages on crape myrtle trees
Source: Research Square preprint supplement (doi:10.21203/rs.3.rs-4889308/v1), 2024-09-27
Supplement: Supplementary file 1 [file 92e7c2411cb1fd7a476cb524.docx]

Crape myrtle bark scale *Eriococcus lagerstroemiae* (Coccidae: Eriococcidae) infestation seasonally alters the abundance and composition of insect assemblages on crape myrtle trees

Elijah P. Carroll1, David W. Held 1*, Nash E. Turley2, Selina Bruckner1

1Department of Entomology and Plant Pathology, Auburn University, 301 Funchess Hall, Auburn, Alabama 36849 USA

2Department of Entomology, Pennsylvania State University, 501 Agricultural Sciences and Industries Building, State College, PA 16803

| **Supplementary Table 1**. Temperature data from Mesonet. Data is shown for each collection date and each sampling time. Daily minimums, maximums, and averages are also presented. | | | | | | | | |
| --- | --- | --- | --- | --- | --- | --- | --- | --- |
| Sampling date | Year | Air temperature (°F) at each sampling time | | | | Daily max (°F) | Daily min (°F) | Average (°F) |
| Daybreak | 9 AM | 12 PM | 3 PM |
| 29-June | 2020 | 73.3 | 76.9 | 86.1 | 91.2 | 91.4 | 70.4 | 79.4 |
| 30-June | 75.3 | 84.1 | 89.3 | 77 | 90.6 | 72.8 | 78.6 |
| 25-July | 75.2 | 82.3 | 88.1 | 91.3 | 91.7 | 71.6 | 79.6 |
| 26-July | 72.8 | 81 | 86.3 | 89.1 | 90.3 | 71.4 | 77.6 |
| 22-August | 69.2 | 78.3 | 83.1 | 85 | 85.4 | 68.5 | 77.31 |
| 23-August | 72.2 | 80.6 | 85.4 | 86 | 87 | 72 | 77.47 |
| 19-September | 69.5 | 70.3 | 71.4 | 71.2 | 71.9 | 65.1 | 69.2 |
| 20-September | 59.6 | 64.8 | 70.9 | 73.1 | 74.4 | 59.3 | 66.1 |
| 24-October | 69.5 | 71.8 | 71.2 | n/a | 73 | 67.4 | 69.4 |
| 25-October | 67.2 | 69.5 | 74.3 | 75.2 | 75.9 | 66.7 | 70.5 |
| 27-March | 2021 | 68.6 | 72.4 | 80.2 | 83.3 | 84.5 | 65.5 | 74 |
| 28-March | 66.9 | 74.6 | 67.9 | 65.3 | 75.9 | 55.3 | 66 |
| 29-April | 66.6 | 69.2 | 78.2 | 77.1 | 78.2 | 65.2 | 70.6 |
| 29-May | 68.2 | 73.2 | 76.7 | 77.7 | 78.2 | 60.1 | 70.7 |

**Supplementary data**

| **Supplementary table 2**. Precipitation means for each sampling month collected from Alabama Mesonet. | | |
| --- | --- | --- |
| Month | Year | Mean monthly precipitation (mm/m2) |
| June | 2020 | 2.47 |
| July | 6.37 |
| August | 5.48 |
| September | 5.43 |
| October | 3.99 |
| March | 2021 | 6.26 |
| April | 3.09 |
| May | 1.09 |


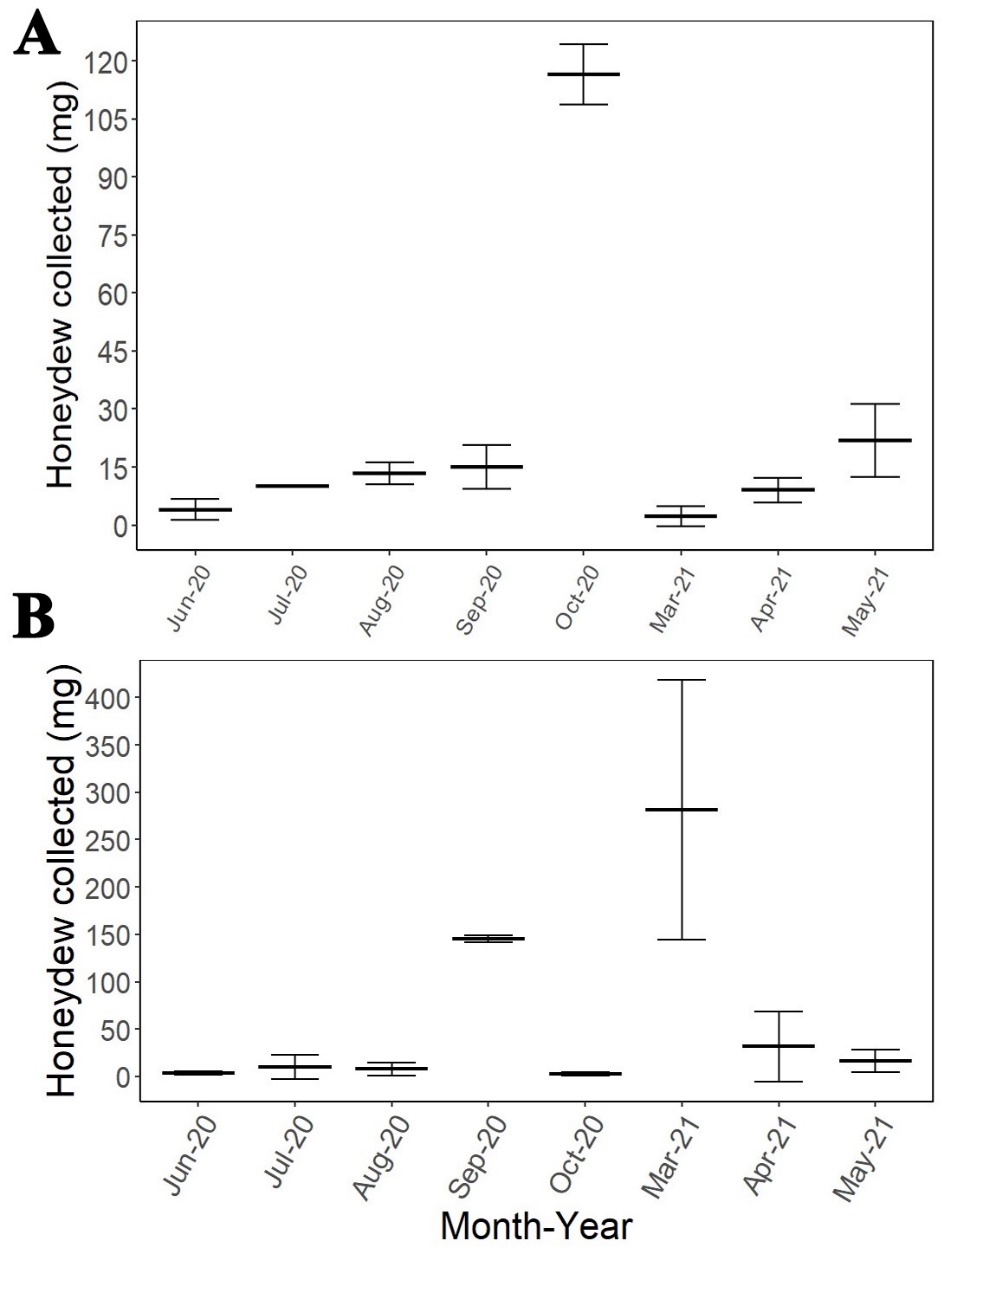


**Supplementary Figure 1.** Mean dry weight of honeydew collected under A) landscape established, CMBS-infested crape myrtles and B) potted crape myrtles used for the visitation experiments during the months of July-Oct 2020 and March-May 2021. Figures are plotted with 95% confidence intervals. On landscape crape myrtles, mean honeydew dry weight in October was significantly greater than that of all other months. Mean honeydew dry weight in May was significantly greater than honeydew dry weight recorded in April, June, and March (*P*< 0.05). Mean honeydew dry weight recorded in September was greater than that recorded in March (*P*<0.05) but did not differ from mean honeydew dry weight recorded in April, June, July, and August. Honeydew collections under infested potted trees confirmed the presence of honeydew coincident with months when trees were sampled for visitation (Figure S1B), ranging between 3.5 mg in October to 281.5 mg in March.

| **Supplementary Table 3.** The orders, families, and abundance of insects observed visiting crape myrtle trees, both infested and non-infested, over an eight-month period, excluding Formicidae. Infested and non-infested show the total abundances recorded on infested and non-infested trees, respectively. | | | | |
| --- | --- | --- | --- | --- |
| **Order** | **Family** | **Total abundance** | **Infested** | **Non-infested** |
| Coleoptera | Buprestidae | 13 | 4 | 9 |
| Cantharidae | 1 | 0 | 1 |
| Chrysomelidae | 16 | 9 | 7 |
| Coccinellidae | 604 | 419 | 186 |
| Curculionidae | 1 | 0 | 1 |
| Elateridae | 1 | 1 | 0 |
| Meloidae | 6 | 3 | 3 |
| Mordellidae | 14 | 9 | 5 |
| Cerambycidae | 1 | 1 | 0 |
| Scarabaeidae | 16 | 9 | 7 |
| Diptera | Agromyzidae | 7 | 5 | 2 |
| Anthomyidae | 2 | 2 | 0 |
| Asilidae | 7 | 3 | 4 |
| Bibionidae | 8 | 3 | 5 |
| Bombyliidae | 1 | 0 | 1 |
| Calliphoridae | 25 | 12 | 13 |
| Chamaemyiidae | 9 | 6 | 3 |
| Chironomidae | 58 | 23 | 35 |
| Chloropidae | 14 | 9 | 5 |
| Chyromyidae | 1 | 0 | 1 |
| Conopidae | 1 | 0 | 1 |
| Dolichopodidae | 1773 | 1031 | 742 |
| Drosophilidae | 42 | 39 | 3 |
| Empedidae | 2 | 1 | 1 |
| Lauxaniidae | 5 | 2 | 3 |
| Muscidae | 191 | 117 | 74 |
| Mycetophilidae | 5 | 2 | 3 |
| Phoridae | 226 | 116 | 110 |
| Piophilidae | 1 | 0 | 1 |
| Platystomatidae | 3 | 3 | 0 |
| Sarcophagidae | 82 | 52 | 30 |
| Sciaridae | 3 | 1 | 2 |
| Sciomyzidae | 3 | 0 | 3 |
| Syrphidae | 41 | 29 | 12 |
| Tabanidae | 2 | 1 | 1 |
| Tachinidae | 15 | 7 | 8 |
| Tephritidae | 9 | 8 | 1 |
| Therevidae | 4 | 1 | 3 |
| Tipulidae | 4 | 2 | 2 |
| Hemiptera | Anthocoridae | 3 | 3 | 0 |
| Cercopidae | 2 | 0 | 2 |
| Cicadellidae | 18 | 8 | 10 |
| Coreidae | 3 | 2 | 1 |
| Delphacidae | 2 | 1 | 1 |
| Flattidae | 1 | 1 | 0 |
| Membracidae | 7 | 4 | 3 |
| Pentatomidae | 6 | 2 | 4 |
| Plataspidae | 39 | 16 | 23 |
| Reduviidae | 7 | 3 | 4 |
| Hymentoptera | Apidae | 3 | 2 | 1 |
| Argidae | 1 | 0 | 1 |
| Braconidae | 16 | 10 | 6 |
| Chalcididae | 1 | 0 | 1 |
| Chrysididae | 2 | 2 | 0 |
| Crabronidae | 1 | 0 | 1 |
| Encyrtidae | 1 | 0 | 1 |
| Euchartidae | 0 | 0 | 0 |
| Eulophidae | 3 | 1 | 2 |
| Eupelmidae | 1 | 1 | 0 |
| Eurytomidae | 5 | 2 | 3 |
| Halictidae | 12 | 12 | 0 |
| Ichneumonidae | 180 | 98 | 82 |
| Mutillidae | 2 | 2 | 0 |
| Orussidae | 1 | 1 | 0 |
| Perilampidae | 1 | 0 | 1 |
| Pteromalidae | 3 | 2 | 1 |
| Scoliidae | 5 | 3 | 2 |
| Sphecidae | 12 | 11 | 1 |
| Tiphiidae | 15 | 10 | 5 |
| Vespidae | 181 | 161 | 20 |
| Neuroptera | Chrysopidae | 2 | 1 | 1 |
| Hemerobiidae | 2 | 0 | 2 |
| Psocodea | Psocidae | 11 | 4 | 7 |

| **Supplementary table 4.** Ant presence/absence data for each month and records to genus/species level. | | | |
| --- | --- | --- | --- |
| Month/year | (+/-) Infested | (+/-) Non-infested | Species |
| June, 2020 | + | - | *L. humile* |
| July, 2020 | + | - | *F. pallidefulva, S. invicta* |
| August, 2020 | + | - | *F. pallidefulva, S. invicta* |
| September, 2020 | + | - | *F. pallidefulva, S. invicta* |
| October, 2020 | + | - | *L. humile* |
| March, 2021 | - | - | - |
| April, 2021 | - | - | *-* |
| May, 2021 | + | - | *L. humile* |

| **Supplementary table 5.** Averages, standard errors, and pairwise comparisons of insect abundance, family-richness, inverse Simpsons diversity, and evenness among observation months. All data were averaged among the two observation days before obtaining diversity metrics. | | | | |
| --- | --- | --- | --- | --- |
| Month/Year | Abundance | Inverse Shannon’s Diversity | Family-level Richness | Evenness |
| June, 2020 | 9.75± 1.09 (b) | 2.03± 0.18 (c) | 4.50± 0.47 (bc) | 0.50± 0.04 (ab) |
| July, 2020 | 25.65± 3.87 (a) | 2.04± 0.13 (c) | 6± 0.67 (b) | 0.39± 0.04 (b) |
| August, 2020 | 10.5± 1.60 (b) | 1.95± 0.17 (c) | 4.20± 0.46 (bc) | 0.55± 0.06 (ab) |
| September, 2020 | 8.2325± 1.73 (b) | 2.77± 0.29 (bc) | 4.90± 0.56 (b) | 0.65± 0.06 (b) |
| October, 2020 | 6.175± 0.64 (b) | 3.02± 0.30 (bc) | 4.35± 0.38 (bc) | 0.71± 0.04 (ab) |
| March, 2021 | 1.665625± 0.30 (b) | 2.33± 0.30 (bc) | 2.56± 0.39 (c) | 0.95± 0.02 (a) |
| April, 2021 | 24.7± 2.57 (a) | 3.39± 0.23 (b) | 5.90± 0.33 (b) | 0.58± 0.03 (b) |
| May, 2021 | 20.2± 2.51 (a) | 4.75± 0.52 (a) | 10.45± 0.70 (a) | 0.47± 0.05 (c) |

| **Supplementary Table 6.** Vespidae samples collected and identified to species-level from crape myrtle trees during the visitation experiment. Infested and non-infested are the abundances of species collected on CMBS infested and non-infested trees. | | | |
| --- | --- | --- | --- |
| Species | Total abundance | Infested | Non-infested |
| *Polistes exclamans* | 9 | 8 | 1 |
| *Polistes carolina* | 3 | 0 | 3 |
| *Polistes rugibinosus* | 2 | 1 | 0 |
| *Vespula squamosa* | 3 | 2 | 1 |
| *Vespula germanica* | 11 | 11 | 0 |
| *Vespula vulgaris* | 7 | 7 | 0 |
| No. species: 6 | Sample size= 34 | 29 | 5 |

| **Supplementary Table 7.** Species/Genera and total abundances of ladybeetles visiting crape myrtles during the field surveys. Infested and non-infested are the abundances of species collected on CMBS infested and non-infested trees. | | | |
| --- | --- | --- | --- |
| Species | Total abundance | Infested | Non-infested |
| *Chilocorus stigma* | 17 | 10 | 7 |
| *Coccinella septempunctata* | 11 | 9 | 2 |
| *Coleomegilla maculata* | 7 | 3 | 4 |
| *Cycloneda munda* | 5 | 5 | 0 |
| *Harmonia axyridis* | 529 | 369 | 160 |
| *Hippodamia convergens* | 2 | 1 | 1 |
| *Hyperaspis bigeminata* | 7 | 2 | 5 |
| *Scymnus sp.* | 26 | 20 | 6 |
| No. genera: 8 | Total abundance= 604 | 419 | 185 |
